# Supplementary material for: Antiseizure and Neuroprotective Efficacy of Midazolam in Comparison with Tezampanel (LY293558) against Soman-Induced Status Epilepticus
Source: MDPI journal article supplement (doi:10.3390/toxics10080409), 2022-07-22
Supplement: s1 [file s1]

# Supplementary Materials: Antiseizure and Neuroprotective Efficacy of Midazolam in Comparison with Tezampanel (LY293558) against Soman-Induced Status Epilepticus

Taiza H. Figueiredo, Vassiliki Aroniadou-Anderjaska, Volodymyr I. Pidoplichko, James P. Apling and

Maria F. M. Braga

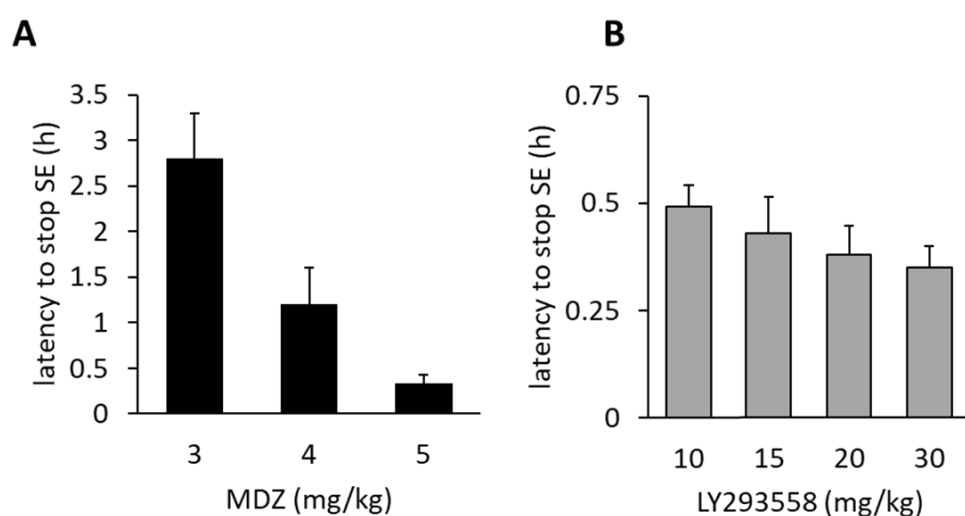

**Figure S1.** Dose-response graphs showing the time to cessation of SE after administration of different doses of midazolam (MDZ) or LY293558. The anticonvulsants were injected intramuscularly 1 h after exposure of young-adult male rats to soman (single subcutaneous injection of 132  $\mu$ g/kg, 1.2 X LD50). (A) Bars show the time it took for 3 mg/kg ( $n = 8$ ), 4 mg/kg ( $n = 8$ ) and 5 mg/kg ( $n = 8$ ) of MDZ to stop the initial SE. (B) Bars show the time it took for 10 mg/kg ( $n = 8$ ), 15 mg/kg ( $n = 8$ ), 20 mg/kg ( $n = 9$ ) and 30 mg/kg ( $n = 10$ ) of LY293558 to stop the initial SE. In the present study, we used 5 mg/kg MDZ and 10 mg/kg LY293558, as both doses stopped SE in less than 30 min and produced 100% survival rate.
